# Supplementary material
Source: publisher figshare collection journal article supplement (https://karger.figshare.com/ndownloader/files/26148968)
Supplement: Supplementary file 1 [file 26148968]

**Supplementary Table 1.** Follow-up of biochemical results in pre-PRRT and post-PRRT period

| **Laboratory results** | **Pre-PRRT** | **Post-PRRT follow-up** | | | | | | |
| --- | --- | --- | --- | --- | --- | --- | --- | --- |
| **Baseline** | **3-month** | **6-month** | **12-month** | **2-year** | **3-year** | **4-year** | **5-year** |
| Hb (g/L) | 123.9 ± 5.3 | 118.4 ± 5.4 | 116.0 ± 7.0 | 117.0 ± 11.2 | 133.3 ± 6.4 | 125.2 ± 7.9 | 145.0 ± 17.0 | 150.0 ± 0.0 |
| WBC (×109/L) | 7.0 ± 0.6 | 6.0 ± 0.6 | 6.3 ± 1.3 | 6.7 ± 1.1 | 6.4 ± 0.5 | 6.8 ± 0.8 | 8.8 ± 0.3 | 7.1 ± 0.0 |
| RBC (×1012/L) | 4.3 ± 0.2 | 4.0 ± 0.2 | 3.9 ± 0.2 | 3.9 ± 0.4 | 4.2 ± 0.3 | 4.0 ± 0.3 | 4.8 ± 0.8 | 5.0 ± 0.0 |
| Platelets (×109/L) | 228.8 ± 11.7 | 212.3 ± 14.5 | 169.8 ± 28.0 | 177.9 ± 18.1 | 216.0 ± 21.9 | 230.7 ± 25.8 | 274.5 ± 46.5 | 259.0 ± 0.0 |
| Neutrophils (×109/L) | 4.9 ± 0.6 | 4.3 ± 0.6 | 4.7 ± 1.3 | 5.2 ± 1.1 | 4.2 ± 0.4 | 4.3 ± 0.7 | 4.7 ± 0.5 | 4.3 ± 0.0 |
| Lymphocytes (×109/L) | 1.4 ± 0.2 | 1.1 ± 0.1 | 1.0 ± 0.2 | **0.9 ± 0.2** | 1.4 ± 0.2 | 1.7 ± 0.4 | 3.0 ± 0.0 | 2.1 ± 0.0 |
| ALT (U/L) | 27.8 ± 4.2 | 24.2 ± 3.5 | **42.3 ± 17.8** | 33.7 ± 10.7 | 28.0 ± 6.6 | 22.8 ± 4.0 | 26.5 ± 9.5 | 33.0 ± 0.0 |
| AST (U/L) | 25.7 ± 2.7 | 22.0 ± 1.1 | 25.7 ± 2.1 | 27.9 ± 3.5 | 23.2 ± 0.9 | 24.6 ± 1.4 | 24.5 ± 2.5 | 22.0 ± 0.0 |
| Total Bilirubin (µmol/L) | 9.8 ± 1.6 | 9.1 ± 0.9 | 14.5 ± 5.2 | 9.4 ± 1.8 | 9.2 ± 1.1 | 9.8 ± 2.9 | 7.5 ± 0.5 | 6.0 ± 0.0 |
| Albumin (g/L) | 44.5 ± 0.9 | 40.2 ± 3.9 | 43.3 ± 2.2 | 42.0 ± 3.8 | 46.5 ±1.4 | 42.5 ± 2.4 | 49.0 ± 2.0 | 48.0 ± 0.0 |
| Urea (mmol/L) | 5.4 ± 0.4 | 5.2 ± 0.5 | 6.8 ± 1.7 | 6.8 ± 1.1 | 6.1 ± 0.9 | 7.0 ±1.1 | 5.9 ± 0.2 | 6.4 ± 0.0 |
| Creatinine (µmol/L) | 75.9 ± 3.0 | 75.6 ± 3.5 | **100.3 ± 23.9** | 84.6 ± 5.2 | 85.5 ± 6.0 | **108.8 ± 23.6** | **103.0 ± 19.0** | 85.0 ± 0.0 |
| eGFR (ml/min) | **81.7 ± 3.0** | **79.8 ± 2.5** | **71.4 ± 7.0** | **71.6 ± 5.1** | **71.2 ± 6.8** | **65.8 ± 10.4** | **68.0 ± 12.0** | **85.0± 0.0** |
| CRP (mg/L) | **12.8 ± 7.5** | **13.9 ± 10.3** | **32.2 ± 24.2** | 3.9 ± 0.8 | **10.2 ± 5.4** | **29.6 ± 25.1** | **7.0 ± 0.0** | 2.0 ± 0.0 |
| **Note:** Average level above or below the normal range were marked as red or blue, respectively.  **Normal range:**  Hb: 110 – 150g/L; WBC: (3.5 – 11)×109/L; RBC: (3.8 – 5.4)×1012/L; Platelets: (140 – 400) ×109/L; Neutrophils: (1.7 – 7.5) ×109/L; Lymphocytes: (1 – 4) ×109/L; ALT: (10 - 35) U/L; AST: (10 - 35) U/L; Total Bilirubin：< 21 µmol/L; Albumin: (35 - 50) g/L; Urea: (2.9 – 8.2) mmol/L; Creatinine: (49 - 92) µmol/L; eGFR: > 90 ml/min; CRP: (0 - 5) mg/L. | | | | | | | | |
